# Supplementary material for: Splicing predictions reliably classify different types of alternative splicing
Source: PubMed Central journal article supplement — RNA. 2015 May;21(5):813–23. doi: 10.1261/rna.048769.114 (PMC4408789; doi:10.1261/rna.048769.114), 2015-05
Supplement: supp_048769.114_SuppMaterial.pdf [file supp_048769.114_SuppMaterial.pdf]

## Supplemental Material

**Supplemental Figure 1.** Performance of SVMs distinguishing between cassette exons and exons with an alternative splice site. Highly included cassette exons were compared to exons with a highly used alternative splice site, while rarely included cassette exons were compared to exons with a rarely used alternative splice site.

(a) cassette exons vs. exons with an alternative 3' splice site (b) cassette exons vs. exons with an alternative 5' splice site

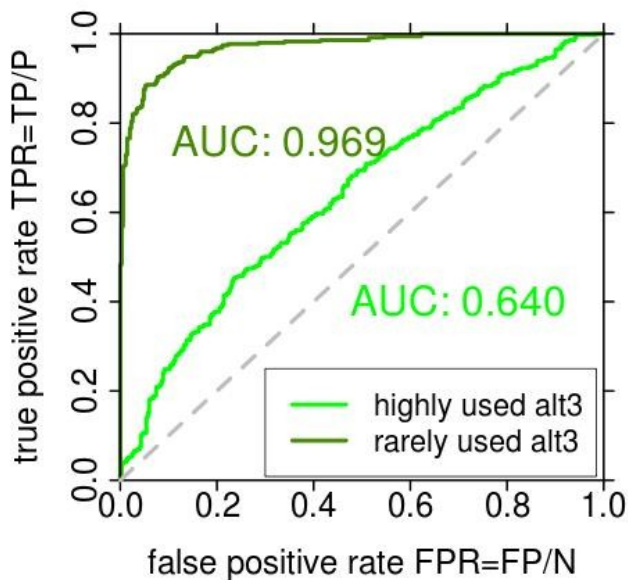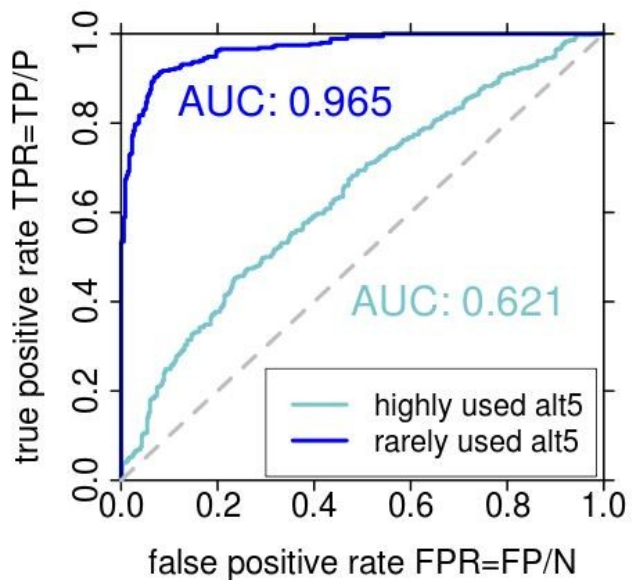

**Supplemental Figure 2.** Performance of the splicing code when increasing the compendium of RNA features to 826, including binding sites for splicing regulators as well as codon frequencies.

(a) all (LOW)

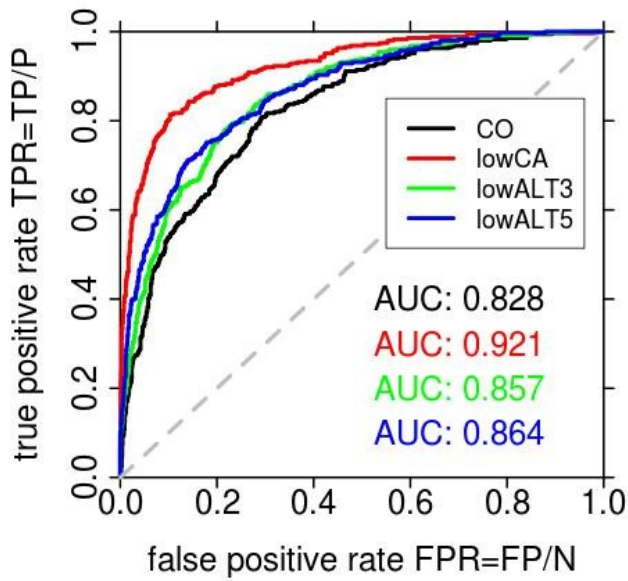

(b) all (HIGH)

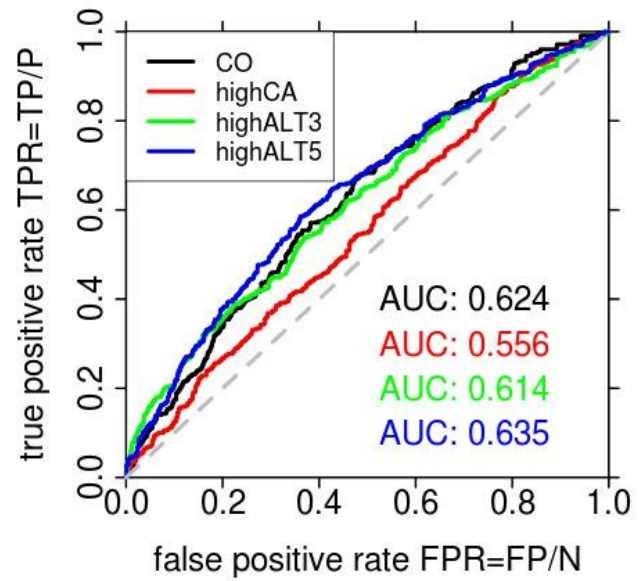

(c) constitutive vs. cassette exons

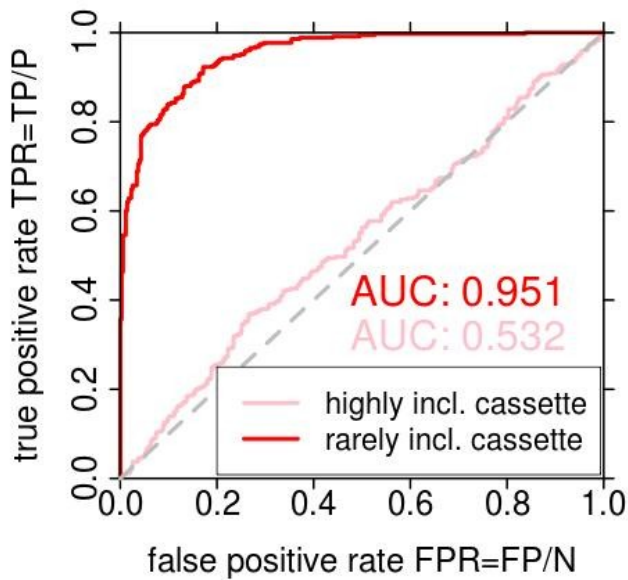

(d) constitutive exons vs. exons with an alternative 3'ss

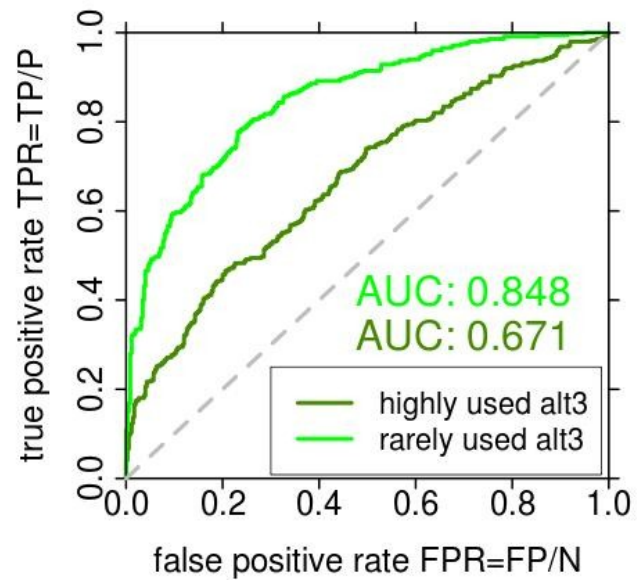

(e) constitutive exons vs. exons with an alternative 5'ss

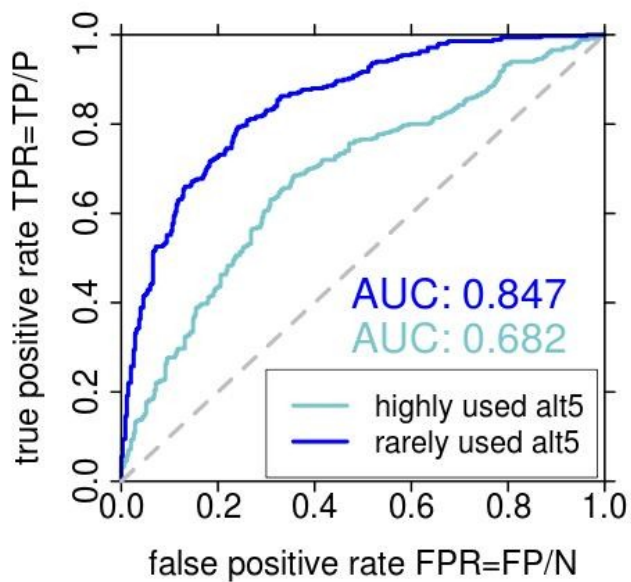

(f) exons with an alternative 3'ss vs. exons with an alternative 5'ss

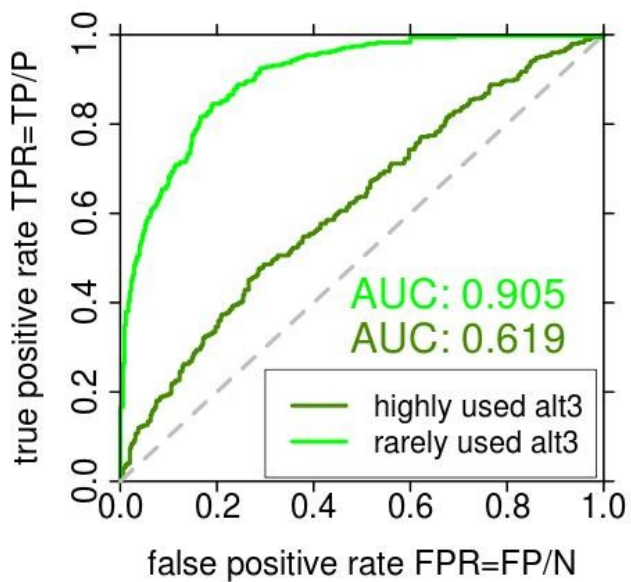

**Supplemental Figure 3.** Most influencing features when increasing the compendium of RNA features to 826, including binding sites for splicing regulators as well as codon frequencies.

(a) color scheme

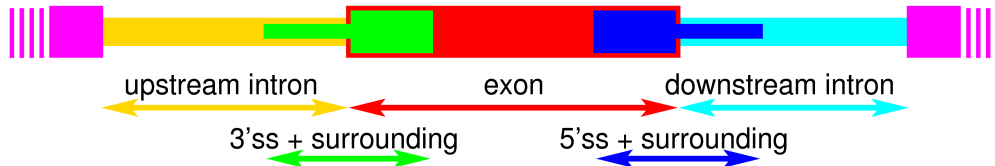

(b) constitutive vs. exons with a rarely used alt. 3' ss

(c) constitutive vs. exons with a rarely used alt. 5' ss

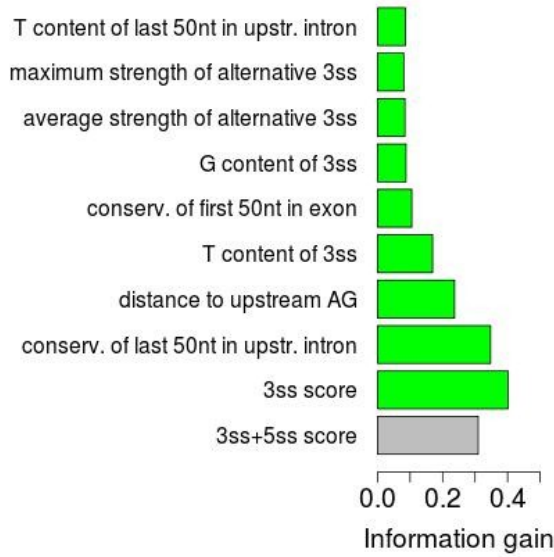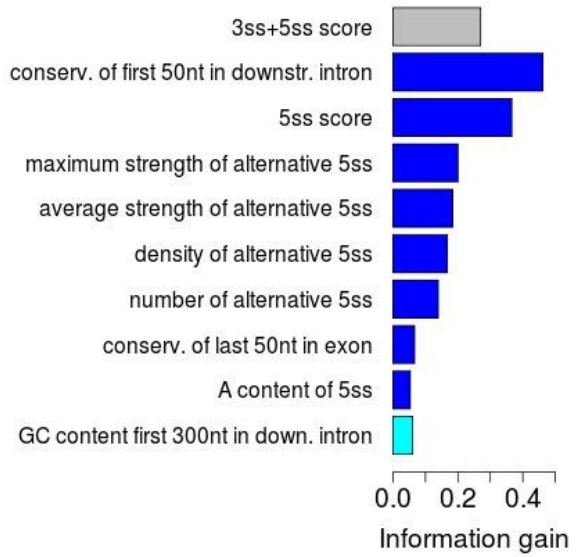

(d) constitutive vs. rarely included cassette exons

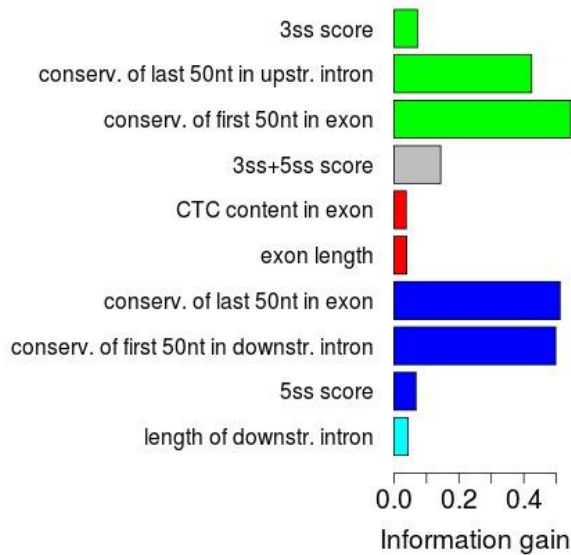

**Supplemental Figure 4.** Performance of the splicing code without using conservation features.

(a) all (LOW)

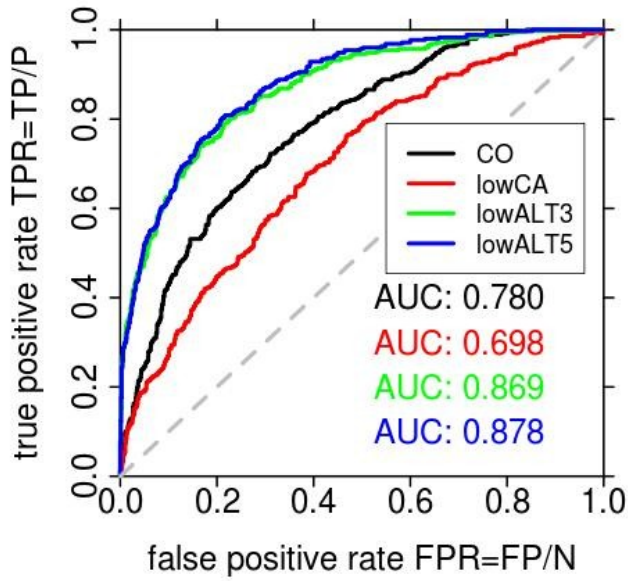

(b) all (HIGH)

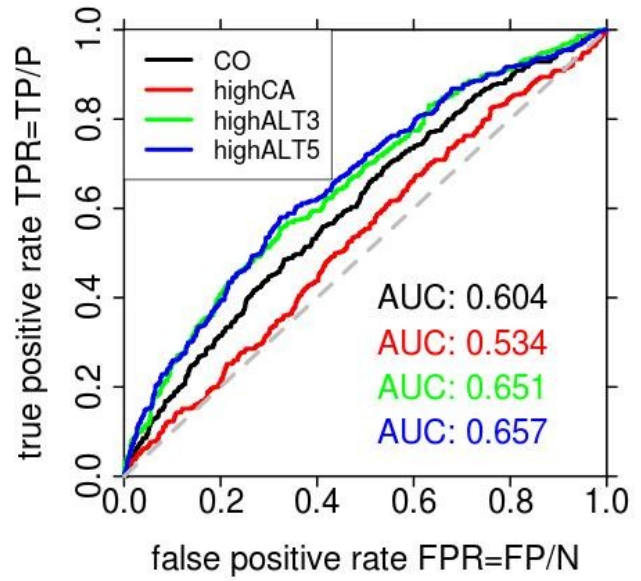

(c) constitutive vs. cassette exons

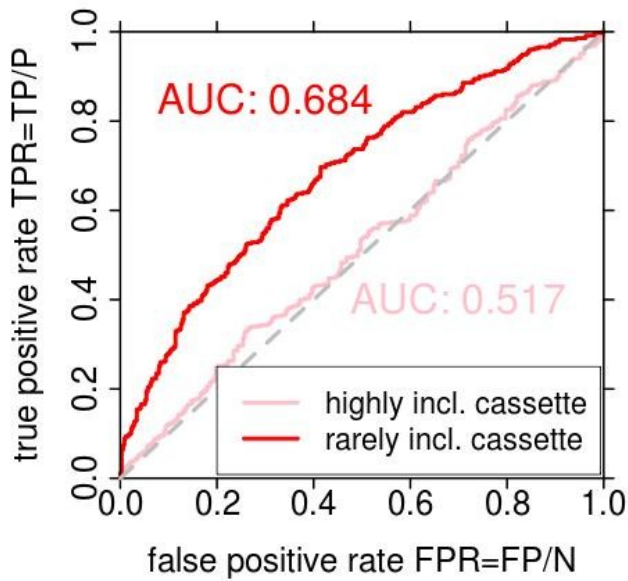

(d) constitutive exons vs. exons with an alternative 3'ss

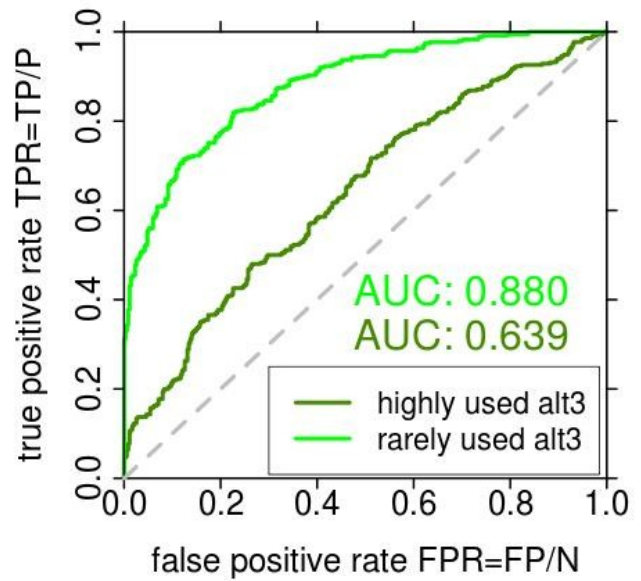

(e) constitutive exons vs. exons with an alternative 5'ss

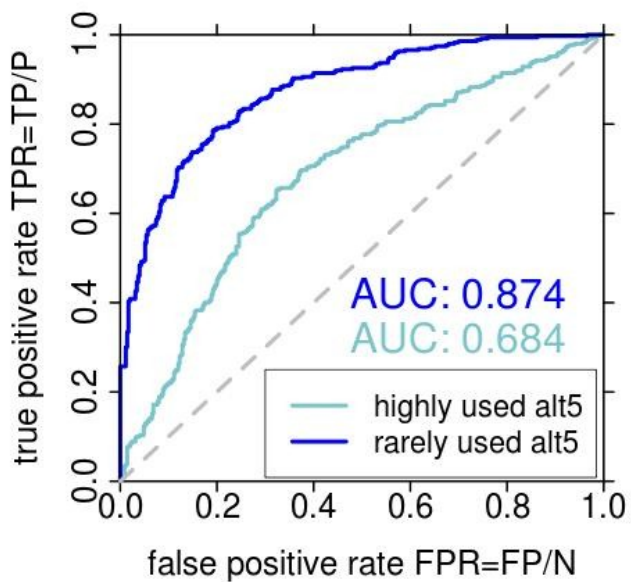

(f) exons with an alternative 3'ss vs. exons with an alternative 5'ss

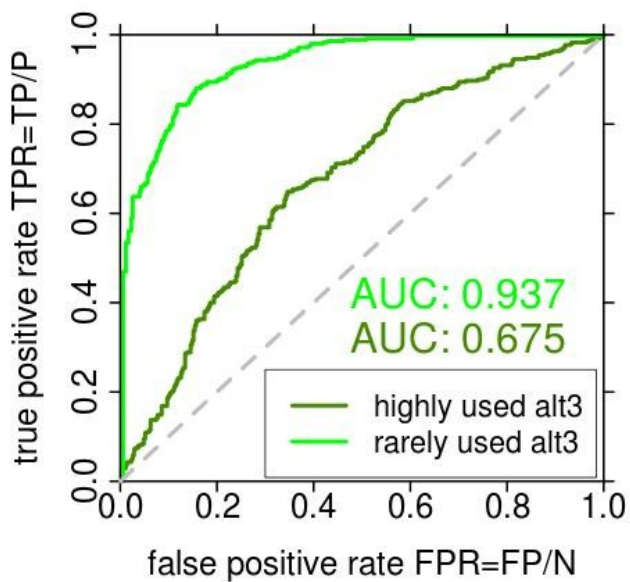

**Supplemental Figure 5.** Performance of SVMs distinguishing between highly included/used exons/splice sites and rarely included/used exons/splice sites.

(a) exons with an alternative 3' splice site

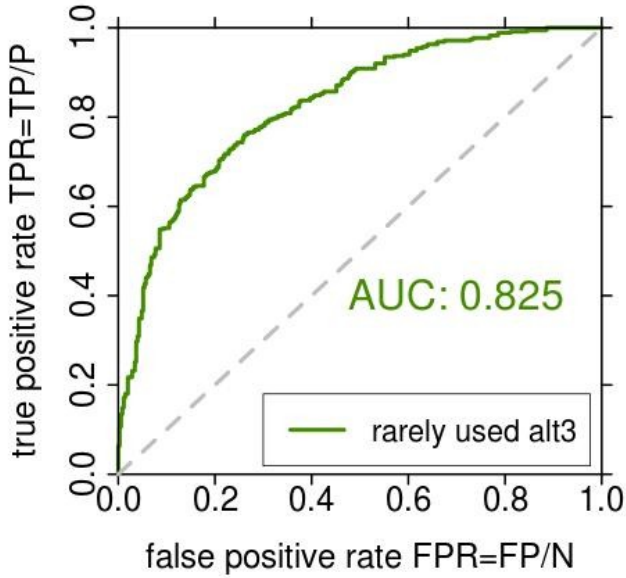

(b) exons with an alternative 5' splice site

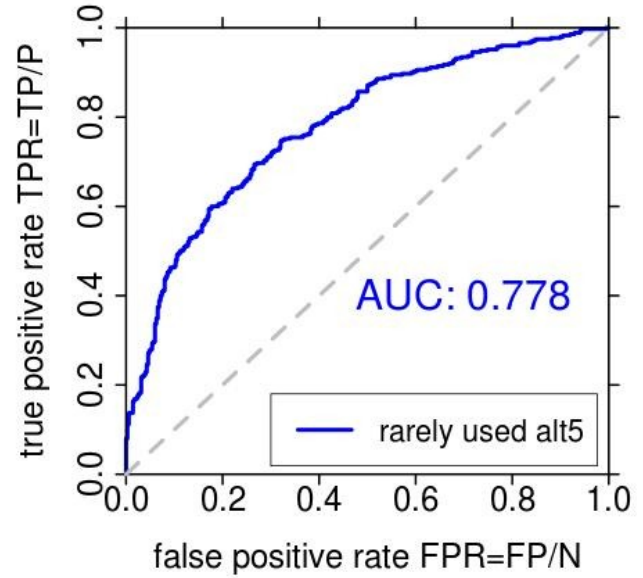

(c) cassette exons

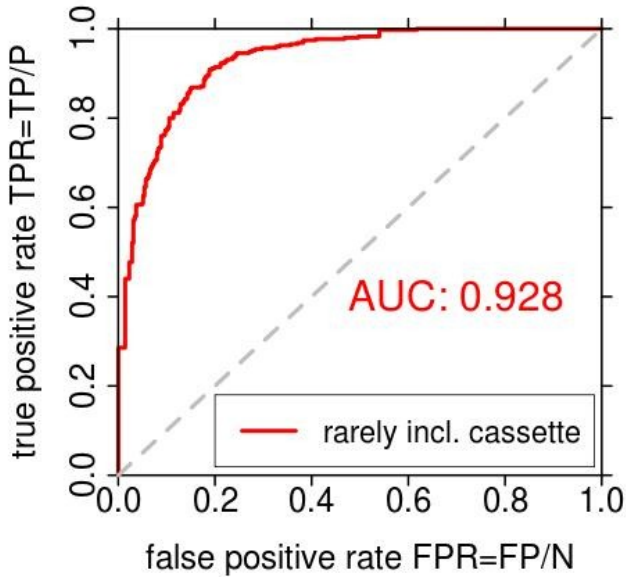

**Supplemental Figure 6.** The distribution of (a) all internal human exons (up to a size of 500nt ) and (b) all human introns (up to a size of 1000nt).

(a) frequencies of internal human exons depending on their size

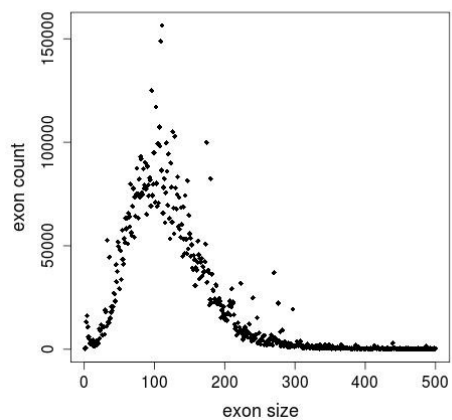

(b) frequencies of human introns depending on their size

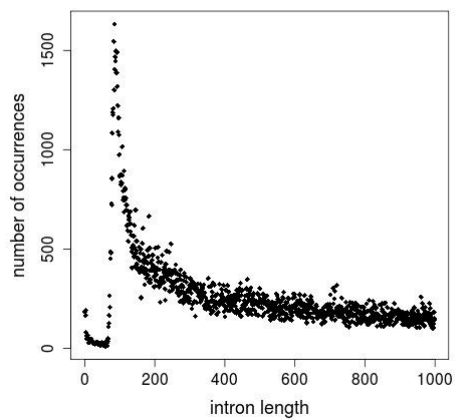



**Supplemental Figure 7.** Precision-recall plots of the splicing code as described in the main manuscript. The recall is defined as the true positive rate  $TPR = TP/P$  (the number of true positives  $TP$  divided by the number of all real positives  $P=TP+FN$ ). The precision is defined as the positive predictive value  $PPV = TP/PP$  (the number of true positives  $TP$  divided by the number of all that are predicted to be positive  $PP=TP+FP$ ).

(a) constitutive vs. exons with an alternative 3' splice site

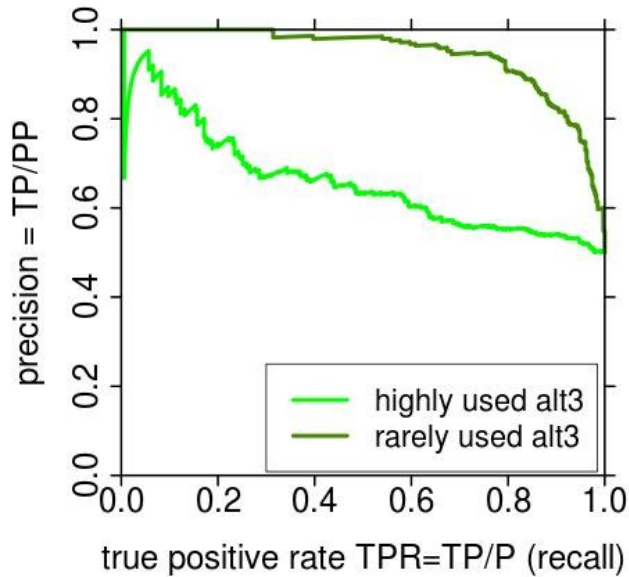

(b) constitutive vs. exons with an alternative 5' splice site

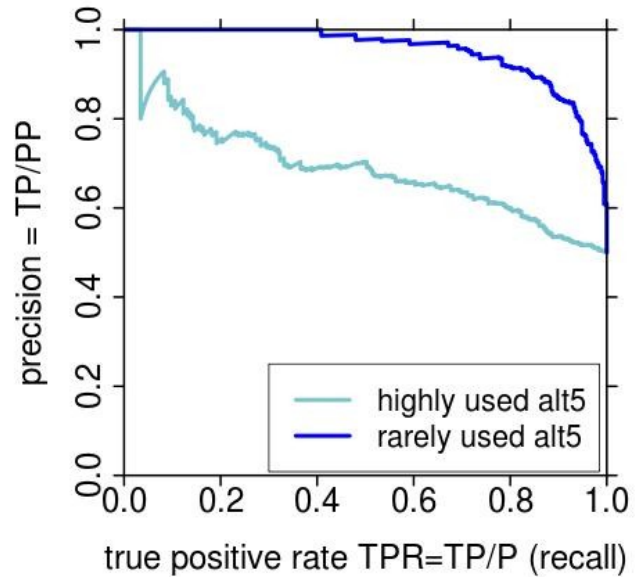

(c) constitutive vs. cassette exons

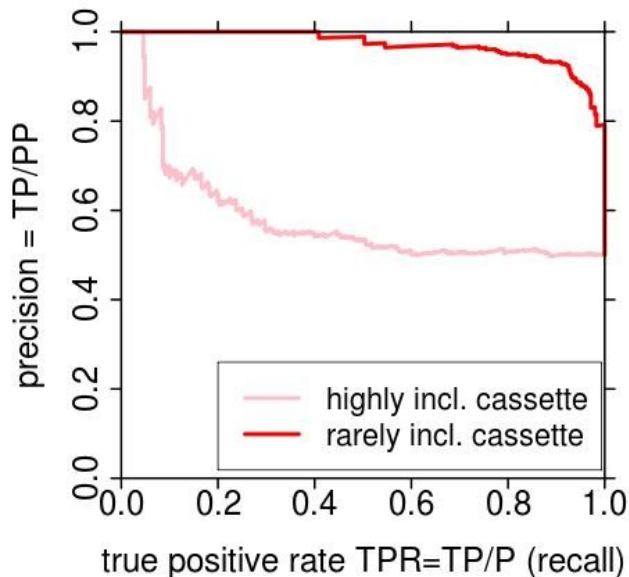

**Supplemental Table 1.** A complete list of RNA features.

| <b>feature name</b>               | <b>data type</b> | <b>region</b> |
|-----------------------------------|------------------|---------------|
| length                            | integer          | E             |
| length-upstream-intron            | integer          | I1            |
| length-downstream-intron          | integer          | I2            |
| length-upstream-exon              | integer          | E1            |
| length-downstream-exon            | integer          | E2            |
| 3ss-score                         | real             | 3ss           |
| 5ss-score                         | real             | 5ss           |
| 3ss5ss-score                      | real             | 3ss+5ss       |
| averagePU-4mers-3ss               | real             | 3ss           |
| averagePU-4mers-5ss               | real             | 5ss           |
| ESEdensity-all                    | real             | E             |
| ESEaver-rel-strength-all          | real             | E             |
| ESEmax-rel-score-all              | real             | E             |
| dist-start-first-ESE-all          | integer          | E             |
| dist-end-last-ESE-all             | integer          | E             |
| ESEdensity-all-PU                 | real             | E             |
| ESEaver-rel-strength-all-PU       | real             | E             |
| ESEmax-rel-score-all-PU           | real             | E             |
| dist-start-first-ESE-all-PU       | integer          | E             |
| dist-end-last-ESE-all-PU          | integer          | E             |
| ESEdensity-ASF                    | real             | E             |
| ESEaver-strength-ASF              | real             | E             |
| ESEaver-rel-strength-ASF          | real             | E             |
| ESEmax-score-ASF                  | real             | E             |
| dist-start-first-ESE-ASF          | integer          | E             |
| dist-end-last-ESE-ASF             | integer          | E             |
| ESEdensity-ASF-PU                 | real             | E             |
| ESEaver-strength-ASF-PU           | real             | E             |
| ESEaver-rel-strength-ASF-PU       | real             | E             |
| ESEmax-score-ASF-PU               | real             | E             |
| dist-start-first-ESE-ASF-PU       | integer          | E             |
| dist-end-last-ESE-ASF-PU          | integer          | E             |
| ESEdensity-IgM-BRCA1              | real             | E             |
| ESEaver-strength-IgM-BRCA1        | real             | E             |
| ESEaver-rel-strength-IgM-BRCA1    | real             | E             |
| ESEmax-score-IgM-BRCA1            | real             | E             |
| dist-start-first-ESE-IgM-BRCA1    | integer          | E             |
| dist-end-last-ESE-IgM-BRCA1       | integer          | E             |
| ESEdensity-IgM-BRCA1-PU           | real             | E             |
| ESEaver-strength-IgM-BRCA1-PU     | real             | E             |
| ESEaver-rel-strength-IgM-BRCA1-PU | real             | E             |
| ESEmax-score-IgM-BRCA1-PU         | real             | E             |
| dist-start-first-ESE-IgM-BRCA1-PU | integer          | E             |
| dist-end-last-ESE-IgM-BRCA1-PU    | integer          | E             |
| ESEdensity-SC35                   | real             | E             |
| ESEaver-strength-SC35             | real             | E             |
| ESEaver-rel-strength-SC35         | real             | E             |
| ESEmax-score-SC35                 | real             | E             |
| dist-start-first-ESE-SC35         | integer          | E             |
| dist-end-last-ESE-SC35            | integer          | E             |

|                                  |         |     |
|----------------------------------|---------|-----|
| ESEdensity-SC35-PU               | real    | E   |
| ESEaver-strength-SC35-PU         | real    | E   |
| ESEaver-rel-strength-SC35-PU     | real    | E   |
| ESEmax-score-SC35-PU             | real    | E   |
| dist-start-first-ESE-SC35-PU     | integer | E   |
| dist-end-last-ESE-SC35-PU        | integer | E   |
| ESEdensity-SRp40                 | real    | E   |
| ESEaver-strength-SRp40           | real    | E   |
| ESEaver-rel-strength-SRp40       | real    | E   |
| ESEmax-score-SRp40               | real    | E   |
| dist-start-first-ESE-SRp40       | integer | E   |
| dist-end-last-ESE-SRp40          | integer | E   |
| ESEdensity-SRp40-PU              | real    | E   |
| ESEaver-strength-SRp40-PU        | real    | E   |
| ESEaver-rel-strength-SRp40-PU    | real    | E   |
| ESEmax-score-SRp40-PU            | real    | E   |
| dist-start-first-ESE-SRp40-PU    | integer | E   |
| dist-end-last-ESE-SRp40-PU       | integer | E   |
| ESEdensity-SRp55                 | real    | E   |
| ESEaver-strength-SRp55           | real    | E   |
| ESEaver-rel-strength-SRp55       | real    | E   |
| ESEmax-score-SRp55               | real    | E   |
| dist-start-first-ESE-SRp55       | integer | E   |
| dist-end-last-ESE-SRp55          | integer | E   |
| ESEdensity-SRp55-PU              | real    | E   |
| ESEaver-strength-SRp55-PU        | real    | E   |
| ESEaver-rel-strength-SRp55-PU    | real    | E   |
| ESEmax-score-SRp55-PU            | real    | E   |
| dist-start-first-ESE-SRp55-PU    | integer | E   |
| dist-end-last-ESE-SRp55-PU       | integer | E   |
| fraction-A-3ss                   | real    | 3ss |
| fraction-C-3ss                   | real    | 3ss |
| fraction-G-3ss                   | real    | 3ss |
| fraction-T-3ss                   | real    | 3ss |
| fraction-A-5ss                   | real    | 5ss |
| fraction-C-5ss                   | real    | 5ss |
| fraction-G-5ss                   | real    | 5ss |
| fraction-T-5ss                   | real    | 5ss |
| fraction-A-exon                  | real    | E   |
| fraction-C-exon                  | real    | E   |
| fraction-G-exon                  | real    | E   |
| fraction-T-exon                  | real    | E   |
| fraction-CG-exon                 | real    | E   |
| fraction-A-50nt-upstream-exon    | real    | E1  |
| fraction-C-50nt-upstream-exon    | real    | E1  |
| fraction-G-50nt-upstream-exon    | real    | E1  |
| fraction-T-50nt-upstream-exon    | real    | E1  |
| fraction-CG-50nt-upstream-exon   | real    | E1  |
| fraction-A-50nt-downstream-exon  | real    | E2  |
| fraction-C-50nt-downstream-exon  | real    | E2  |
| fraction-G-50nt-downstream-exon  | real    | E2  |
| fraction-T-50nt-downstream-exon  | real    | E2  |
| fraction-CG-50nt-downstream-exon | real    | E2  |

|                                                     |         |             |
|-----------------------------------------------------|---------|-------------|
| ISSdensity-up50nt-all                               | real    | I1          |
| ISSaver-rel-strength-up50nt-all                     | real    | I1          |
| ISSmax-rel-score-up50nt-all                         | real    | I1          |
| dist-start-firstISS-up50nt-all                      | integer | I1          |
| dist-end-lastISS-up50nt-all                         | integer | I1          |
| ISSdensity-down50nt-all                             | real    | I2          |
| ISSaver-rel-strength-down50nt-all                   | real    | I2          |
| ISSmax-rel-score-down50nt-all                       | real    | I2          |
| dist-start-firstISS-down50nt-all                    | integer | I2          |
| dist-end-lastISS-down50nt-all                       | integer | I2          |
| number-altSS-around-3ss-score>=0                    | integer | 3ss+/-200nt |
| number-altSS-around-3ss-score>=1                    | integer | 3ss+/-200nt |
| number-altSS-around-3ss-score>=2                    | integer | 3ss+/-200nt |
| number-altSS-around-3ss-score>=3                    | integer | 3ss+/-200nt |
| number-altSS-around-3ss-score>=4                    | integer | 3ss+/-200nt |
| number-altSS-around-3ss-score>=5                    | integer | 3ss+/-200nt |
| number-altSS-around-3ss-score>=6                    | integer | 3ss+/-200nt |
| number-altSS-around-3ss-score>=7                    | integer | 3ss+/-200nt |
| number-altSS-around-3ss-score>=7.5                  | integer | 3ss+/-200nt |
| number-altSS-around-3ss-score>=8                    | integer | 3ss+/-200nt |
| number-altSS-around-3ss-score>=8.5                  | integer | 3ss+/-200nt |
| number-altSS-around-3ss-score>=9                    | integer | 3ss+/-200nt |
| number-altSS-around-3ss-score>=9.5                  | integer | 3ss+/-200nt |
| number-altSS-around-3ss-score>=10                   | integer | 3ss+/-200nt |
| number-altSS-around-3ss-score>=10.5                 | integer | 3ss+/-200nt |
| number-altSS-around-3ss-score>=11                   | integer | 3ss+/-200nt |
| density-altSS-around-3ss-score>=0-norm-by-length    | real    | 3ss+/-200nt |
| density-altSS-around-3ss-score>=1-norm-by-length    | real    | 3ss+/-200nt |
| density-altSS-around-3ss-score>=2-norm-by-length    | real    | 3ss+/-200nt |
| density-altSS-around-3ss-score>=3-norm-by-length    | real    | 3ss+/-200nt |
| density-altSS-around-3ss-score>=4-norm-by-length    | real    | 3ss+/-200nt |
| density-altSS-around-3ss-score>=5-norm-by-length    | real    | 3ss+/-200nt |
| density-altSS-around-3ss-score>=6-norm-by-length    | real    | 3ss+/-200nt |
| density-altSS-around-3ss-score>=7-norm-by-length    | real    | 3ss+/-200nt |
| density-altSS-around-3ss-score>=7.5-norm-by-length  | real    | 3ss+/-200nt |
| density-altSS-around-3ss-score>=8-norm-by-length    | real    | 3ss+/-200nt |
| density-altSS-around-3ss-score>=8.5-norm-by-length  | real    | 3ss+/-200nt |
| density-altSS-around-3ss-score>=9-norm-by-length    | real    | 3ss+/-200nt |
| density-altSS-around-3ss-score>=9.5-norm-by-length  | real    | 3ss+/-200nt |
| density-altSS-around-3ss-score>=10-norm-by-length   | real    | 3ss+/-200nt |
| density-altSS-around-3ss-score>=10.5-norm-by-length | real    | 3ss+/-200nt |
| density-altSS-around-3ss-score>=11-norm-by-length   | real    | 3ss+/-200nt |
| averStrength-altSS-around-3ss-score>=0              | real    | 3ss+/-200nt |
| averStrength-altSS-around-3ss-score>=1              | real    | 3ss+/-200nt |
| averStrength-altSS-around-3ss-score>=2              | real    | 3ss+/-200nt |
| averStrength-altSS-around-3ss-score>=3              | real    | 3ss+/-200nt |
| averStrength-altSS-around-3ss-score>=4              | real    | 3ss+/-200nt |
| averStrength-altSS-around-3ss-score>=5              | real    | 3ss+/-200nt |
| averStrength-altSS-around-3ss-score>=6              | real    | 3ss+/-200nt |
| averStrength-altSS-around-3ss-score>=7              | real    | 3ss+/-200nt |
| averStrength-altSS-around-3ss-score>=7.5            | real    | 3ss+/-200nt |
| averStrength-altSS-around-3ss-score>=8              | real    | 3ss+/-200nt |
| averStrength-altSS-around-3ss-score>=8.5            | real    | 3ss+/-200nt |



|                                         |         |             |
|-----------------------------------------|---------|-------------|
| averStrength-altSS-around-5ss-score>=11 | real    | 5ss+/-200nt |
| maxStrength-altSS-around-5ss            | real    | 5ss+/-200nt |
| averConservation-up50nt-3ss             | real    | I1          |
| averConservation-down50nt-3ss           | real    | E           |
| averConservation-up50nt-5ss             | real    | E           |
| averConservation-down50nt-5ss           | real    | I2          |
| distance-upstreamAG                     | integer | I1          |
| maxPU-3ss                               | real    | 3ss         |
| minPU-3ss                               | real    | 3ss         |
| maxPU-5ss                               | real    | 5ss         |
| minPU-5ss                               | real    | 5ss         |
| averPU-70nt-upstream-exon               | real    | I1          |
| maxPU-70nt-upstream-exon                | real    | I1          |
| minPU-70nt-upstream-exon                | real    | I1          |
| averPU-first70nt-exon                   | real    | E           |
| maxPU-first70nt-exon                    | real    | E           |
| minPU-first70nt-exon                    | real    | E           |
| averPU-last70nt-exon                    | real    | E           |
| maxPU-last70nt-exon                     | real    | E           |
| minPU-last70nt-exon                     | real    | E           |
| averPU-70nt-downstream-exon             | real    | I2          |
| maxPU-70nt-downstream-exon              | real    | I2          |
| minPU-70nt-downstream-exon              | real    | I2          |
| upstream-intron-Urich-count             | integer | I1          |
| upstream-intron-Urich-density           | real    | I1          |
| downstream-intron-Urich-count           | integer | I2          |
| downstream-intron-Urich-density         | real    | I2          |
| upstream-intron-MBNL1-count             | integer | I1          |
| upstream-intron-MBNL1-density           | real    | I1          |
| downstream-intron-MBNL1-count           | integer | I2          |
| downstream-intron-MBNL1-density         | real    | I2          |
| upstream-intron-CUrich-count            | integer | I1          |
| upstream-intron-CUrich-density          | real    | I1          |
| downstream-intron-CUrich-count          | integer | I2          |
| downstream-intron-CUrich-density        | real    | I2          |
| upstream-intron-Fox-count               | integer | I1          |
| upstream-intron-Fox-density             | real    | I1          |
| downstream-intron-Fox-count             | integer | I2          |
| downstream-intron-Fox-density           | real    | I2          |
| upstream-intron-CUGrich-count           | integer | I1          |
| upstream-intron-CUGrich-density         | real    | I1          |
| downstream-intron-CUGrich-count         | integer | I2          |
| downstream-intron-CUGrich-density       | real    | I2          |
| upstream-intron-Qkl-count               | integer | I1          |
| upstream-intron-Qkl-density             | real    | I1          |
| downstream-intron-Qkl-count             | integer | I2          |
| downstream-intron-Qkl-density           | real    | I2          |
| upstream-intron-Nova-count              | integer | I1          |
| upstream-intron-Nova-density            | real    | I1          |
| downstream-intron-Nova-count            | integer | I2          |
| downstream-intron-Nova-density          | real    | I2          |
| exon-Nova-count                         | integer | E           |
| exon-Nova-density                       | real    | E           |
